# Supplementary material for: “Social Media Makes It Inevitable to Feel Bad about Your Body”: Examining Self-Presentation and Body Image of Young Collegiate Females
Source: MDPI journal article supplement (doi:10.3390/youth2030016), 2022-06-27
Supplement: s1 [file s1]

Archive with 1 entries (1 files):
- youth-1673676-supplementary.pdf
